# Supplementary material
Source: PubMed Central journal article supplement (PMC1451235)
Supplement: JCI0627607sd.pdf [file JCI0627607sd.pdf]

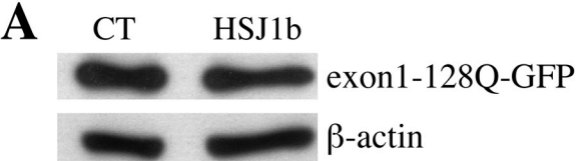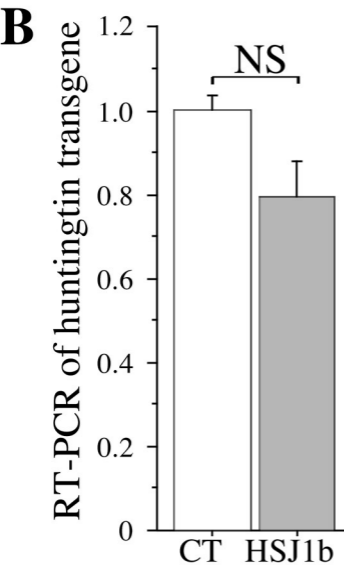

*bdnf*<sup>+/+</sup>

*bdnf*<sup>+/-</sup>

*htt*<sup>wt</sup>

saline

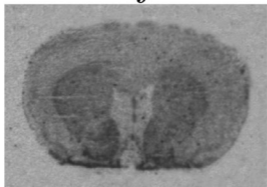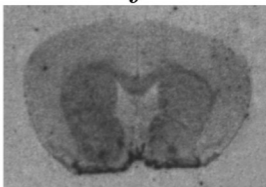

cysteamine

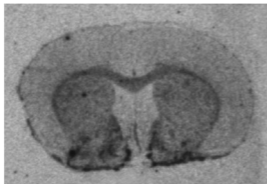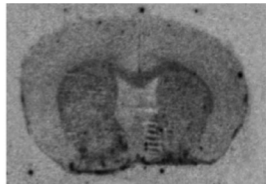

*htt*<sup>m</sup>

saline

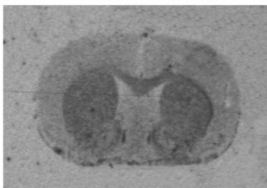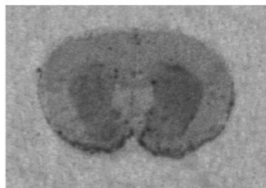

cysteamine

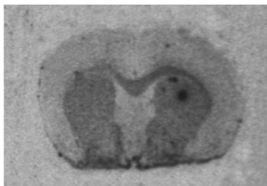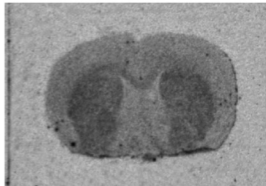

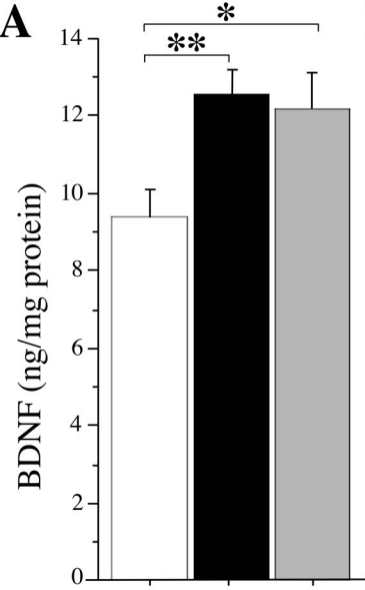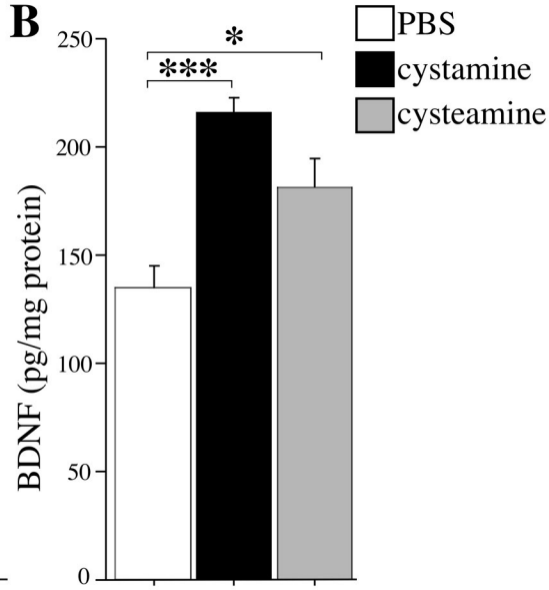

## Supplemental figures

**Figure S1** Western blotting (A) and quantitative RT-PCR (B) revealed no significant change in the expression of exon1-128Q-GFP in *C. elegans* with the addition of HSJ1b.

(A) Representative Western blotting analysis of exon1-128Q-GFP fusion protein in control and in HSJ1b expressing worms. Quantification of at least three independent experiments performed in triplicates revealed no statistical difference in the amount of the 128Q fusion protein compared to controls by Western blotting (Student *t*-test,  $t_{18} = 1.414$ ; NS).

(B) Data from at least three independent experiments performed in triplicates revealed no statistical difference in expression of the 128Q transgene in *C. elegans* compared to controls by quantitative RT-PCR (Student *t*-test,  $t_{19} = 0.532$ ; NS).

Quantitative RT-PCR of transgenic strains and analysis were done as described elsewhere (33). Oligonucleotides used for huntingtin transgenics: 5'-CACTACTGGAAACTACCTG-3' and 5'-TGTAGTTCCCGTCATCTTTGA-3'.

**Figure S2** The decrease in substance P-positive neurons (SP) is similar in R6/1 (*bdnf<sup>+/+</sup>htt<sup>m</sup>*) and *bdnf<sup>+/-</sup>htt<sup>m</sup>* mice. SP mRNA levels of expression were not modified by cysteamine treatment.

**Figure S3** Cystamine and cysteamine increase BDNF levels in the brain (A) and blood (B) of mice treated for 12 weeks. (A) Data from 2 independent experiments with 3 to 8 mice per condition (ANOVA,  $F_{2, 17} = 5.00$ ;  $P = 0.0196$ ) revealed a statistically significant increase in the amount of BDNF in the brain of mice treated with cystamine (posthoc Fisher's test,  $P = 0.0085$ ) or with cysteamine (posthoc Fisher's test,  $P = 0.0234$ ) compared to controls. (B) Data from 2 independent experiments with 3 to 8 mice per condition (ANOVA,  $F_{2, 14} = 13.50$ ;  $P = 0.0005$ ) revealed a statistically significant increase in the

amount of BDNF in the serum of mice treated with cystamine (posthoc Fisher's test,  $P = 0.0001$ ) or with cysteamine (posthoc Fisher's test,  $P = 0.01$ ) compared to controls.
